# Supplementary material
Source: PubMed Central journal article supplement (PMC6525020)
Supplement: NIHMS1518199-supplement-9.pdf [file NIHMS1518199-supplement-9.pdf]

**Table S1. shRNA target sequences and sources**

| shRNA and siRNA             | Referred to herein as | Sequence                                                                                | Source                                                             |
|-----------------------------|-----------------------|-----------------------------------------------------------------------------------------|--------------------------------------------------------------------|
| <b>Scramble shRNA</b>       | shSCR                 | CCGGTCCTAAGGTTAAGTCGC<br>CCTCGCTCGAGCGAGGGCGA<br>CTTAACCTTAGGTTTTTG                     | MUSC Hollings Cancer Center<br>shRNA Shared Resource<br>Technology |
| <b>Scramble siRNA</b>       | siSCRAM/scarm         | #6568                                                                                   | Cell Signaling Technologies                                        |
| <b>Mouse/human hnRNP E1</b> | shE1 / E1KD           | CCGGCCATGATCCAAGTGTGT<br>AATTCTCGAGAATTACACAGT<br>TGGATCATGGTTTTTG<br>(TRCN0000120937)  | MUSC Hollings Cancer Center<br>shRNA Shared Resource<br>Technology |
| <b>Mouse sh ILEI</b>        | shILEI                | CCGGGAACAGCACATAAAGA<br>ACAATCTCGAGATTGTTCTTTA<br>TGTGCTGTTCTTTTTTG<br>(TRCN0000191798) | MUSC Hollings Cancer Center<br>shRNA Shared Resource<br>Technology |
| <b>Mouse si ILEI 1</b>      | si ILEI 1             | D057098-01-002                                                                          | Dharmacon Inc                                                      |
| <b>Mouse si ILEI 2</b>      | si ILEI 2             | D-057098-02-002                                                                         | Dharmacon Inc                                                      |
| <b>Human sh ILEI 1</b>      | shILEI 1              | CCGGATGTTGGAAGAGGGAT<br>CAATGCTCGAGCATTGATCCC<br>TCTTCCAACATTTTTTG<br>(TRCN0000298583)  | MUSC Hollings Cancer Center<br>shRNA Shared Resource<br>Technology |
| <b>Human sh ILEI 2</b>      | shILEI 2              | CCGGGAGGAGATGTGGCACC<br>ATTTACTCGAGTAAATGGTGC<br>CACATCTCCTCTTTTTG<br>(TRCN0000298584)  | MUSC Hollings Cancer Center<br>shRNA Shared Resource<br>Technology |
| <b>Human sh ILEI 3</b>      | shILEI 3              | CCGGCTTGGTGTGTGCATGA<br>GTATTCTCGAGAATACTCATG<br>CACACACCAAGTTTTTG<br>(TRCN0000293815)  | MUSC Hollings Cancer Center<br>shRNA Shared Resource<br>Technology |
| <b>Mouse sh LIFR</b>        | shLIFR                | CCGGGCAGAGATACAGCTTA<br>GTAAACTCGAGTTTACTAAGC<br>TGTATCTCTGCTTTTTG<br>(TRCN0000065613)  | MUSC Hollings Cancer Center<br>shRNA Shared Resource<br>Technology |
| <b>Mouse si LIFR 1</b>      | si LIFR 1             | D-040750-01-002                                                                         | Dharmacon Inc                                                      |
| <b>Mouse si LIFR 2</b>      | si LIFR 2             | D-040750-02-002                                                                         | Dharmacon Inc                                                      |
