# Supplementary material
Source: PubMed Central journal article supplement (PMC6525020)

# Figure S1

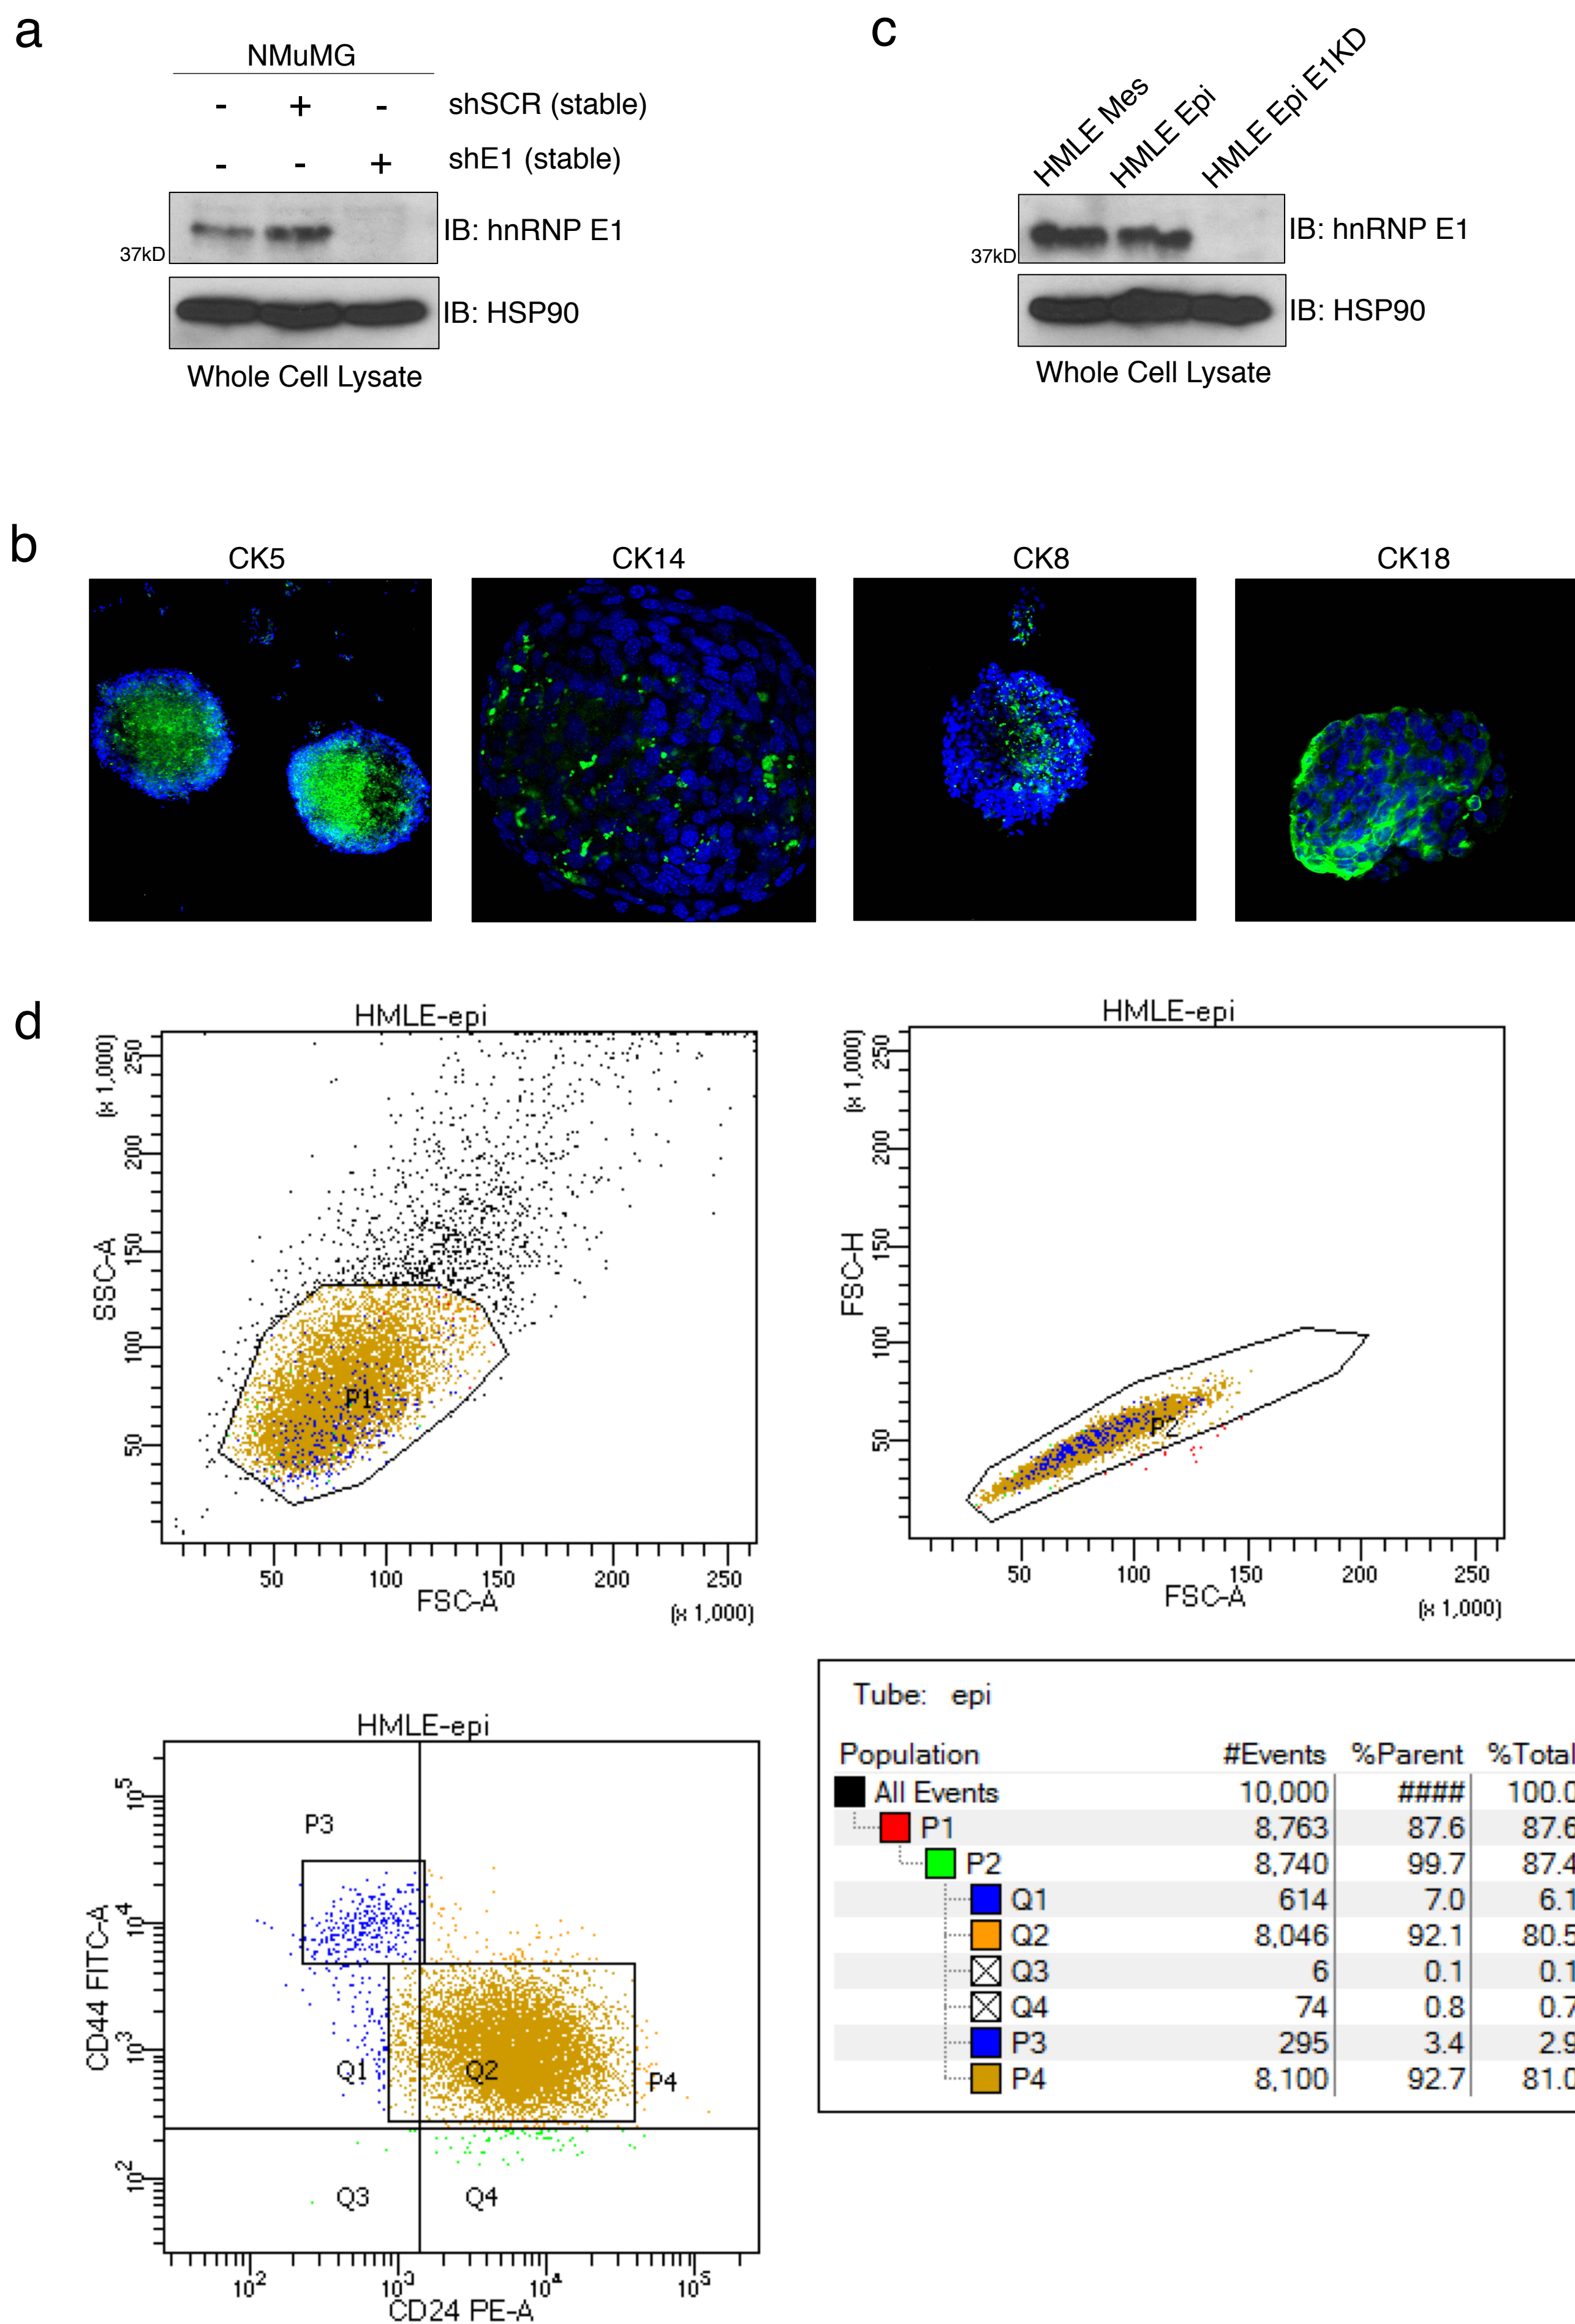

Supplement: NIHMS1518199-supplement-1.pdf [file NIHMS1518199-supplement-1.pdf]

**Figure S2**

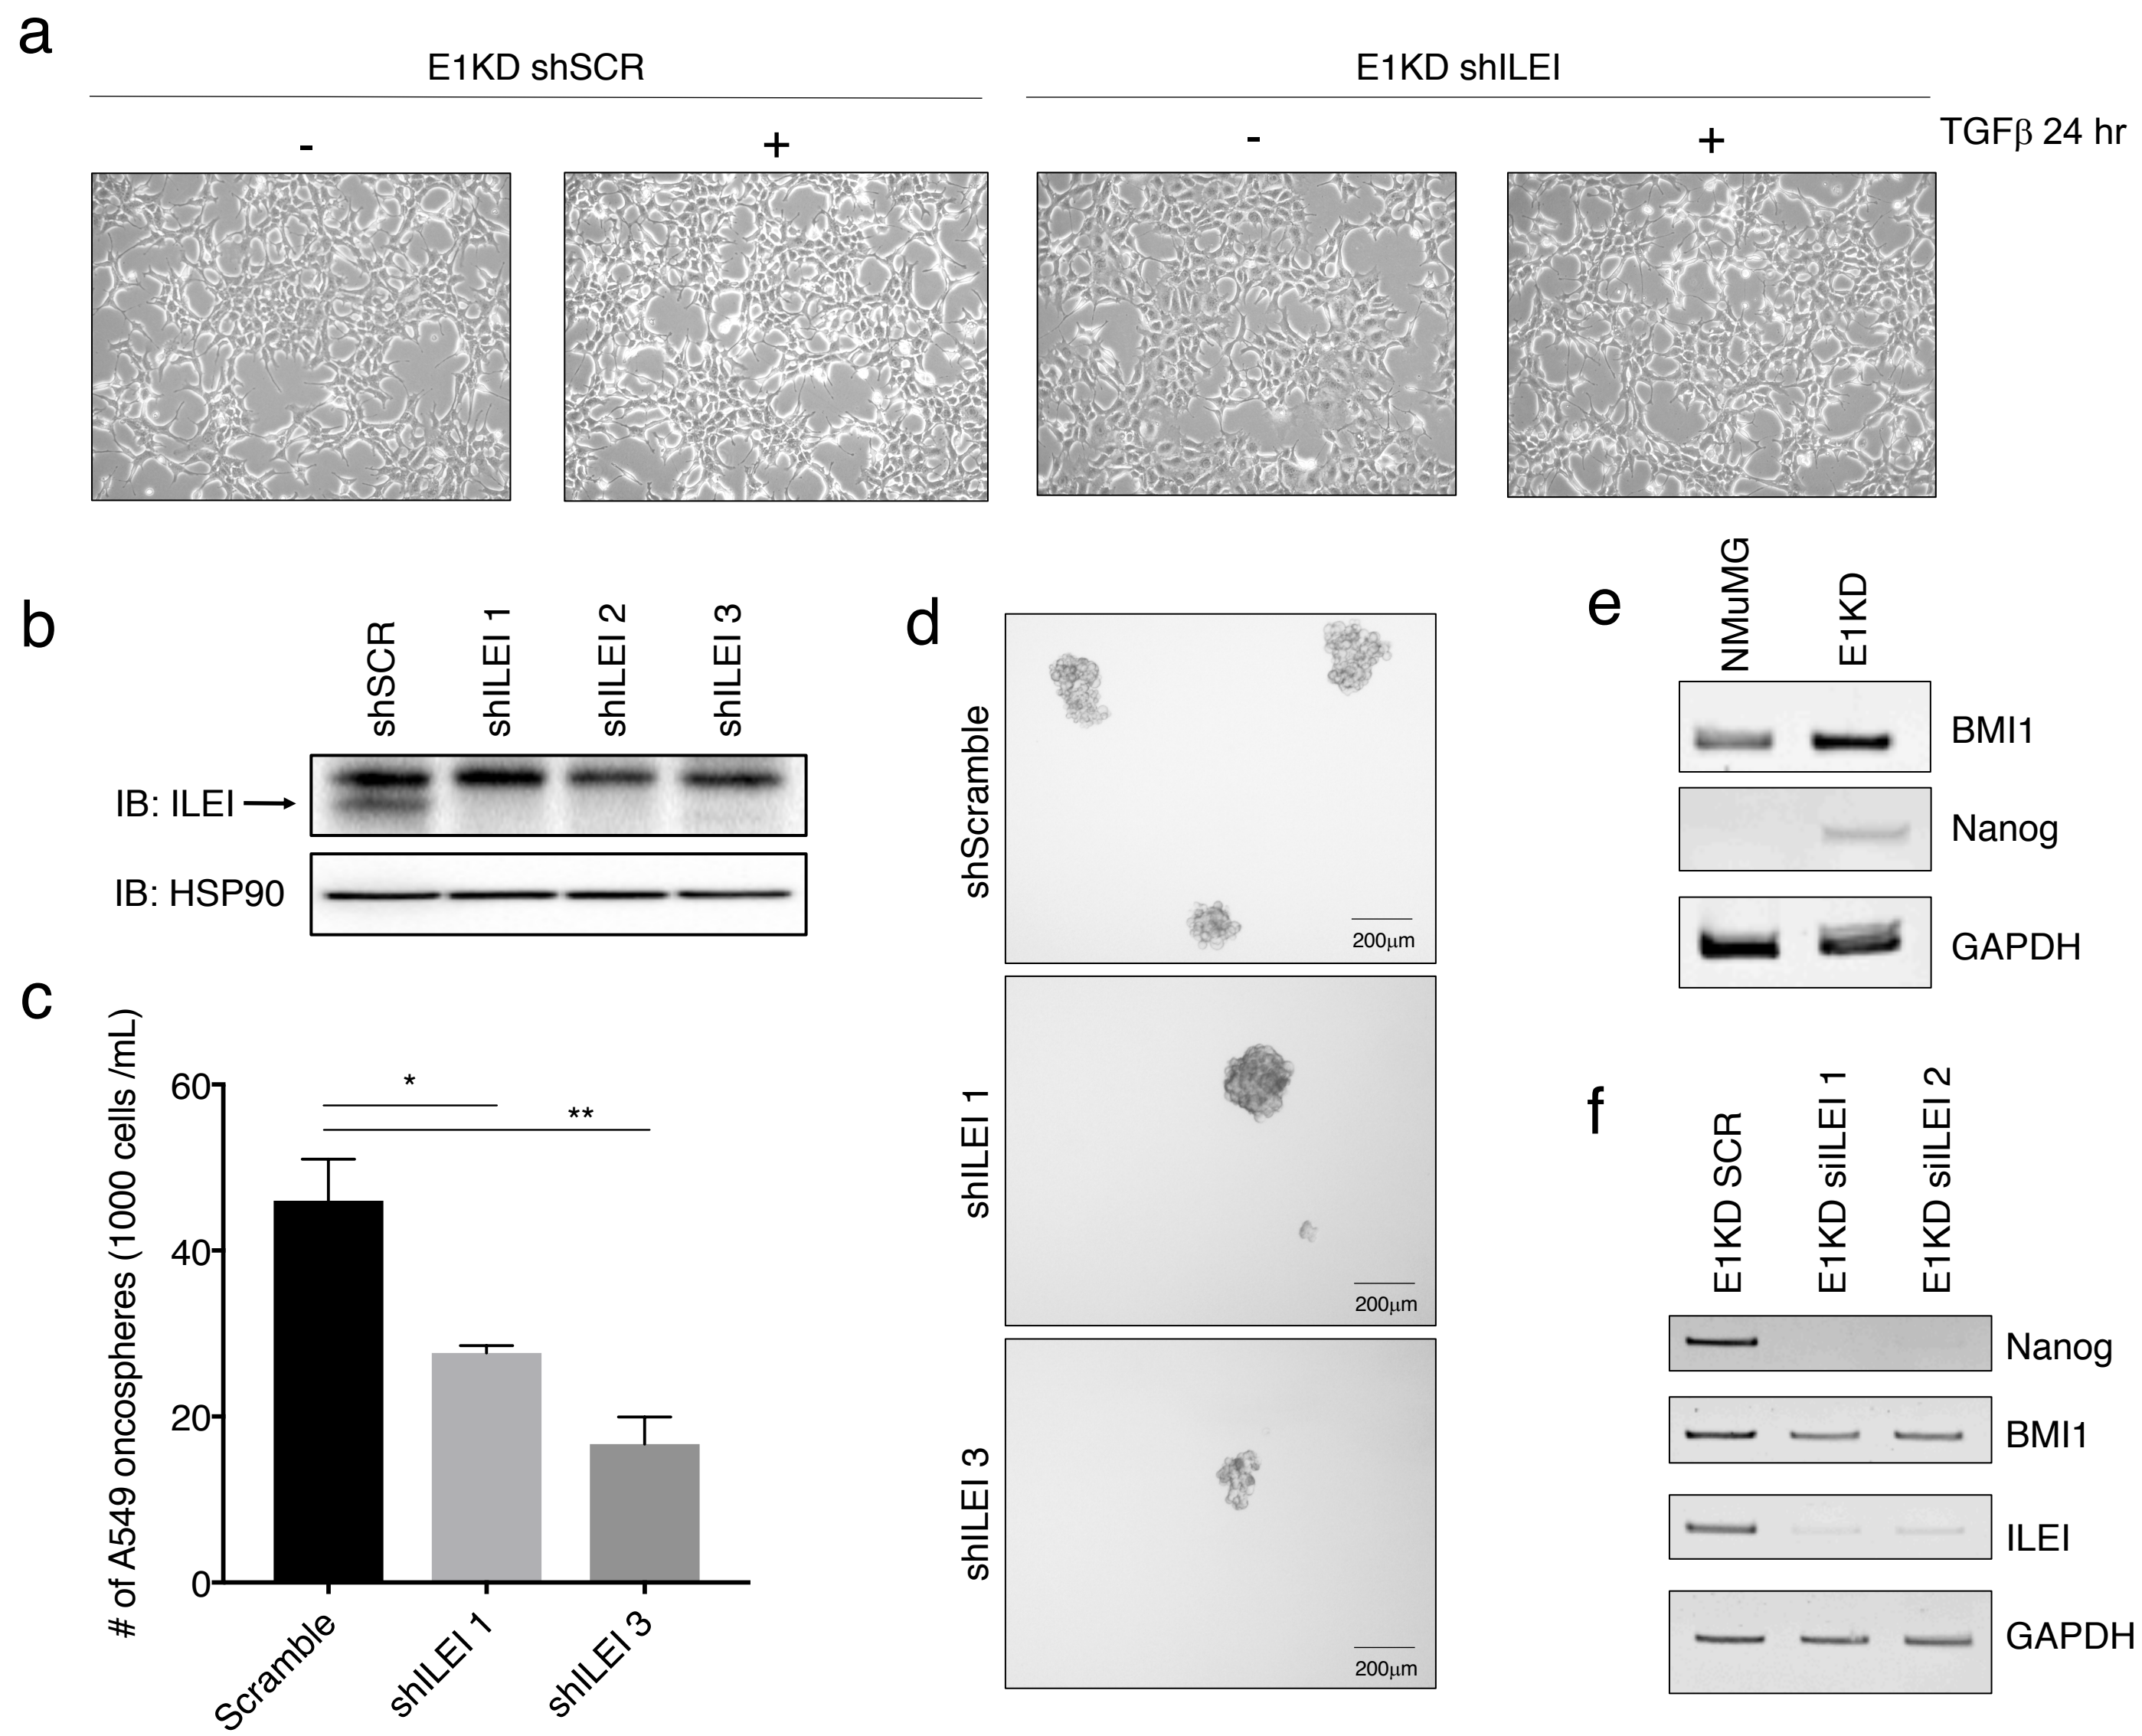

Supplement: NIHMS1518199-supplement-2.pdf [file NIHMS1518199-supplement-2.pdf]

**Figure S3**

**a**

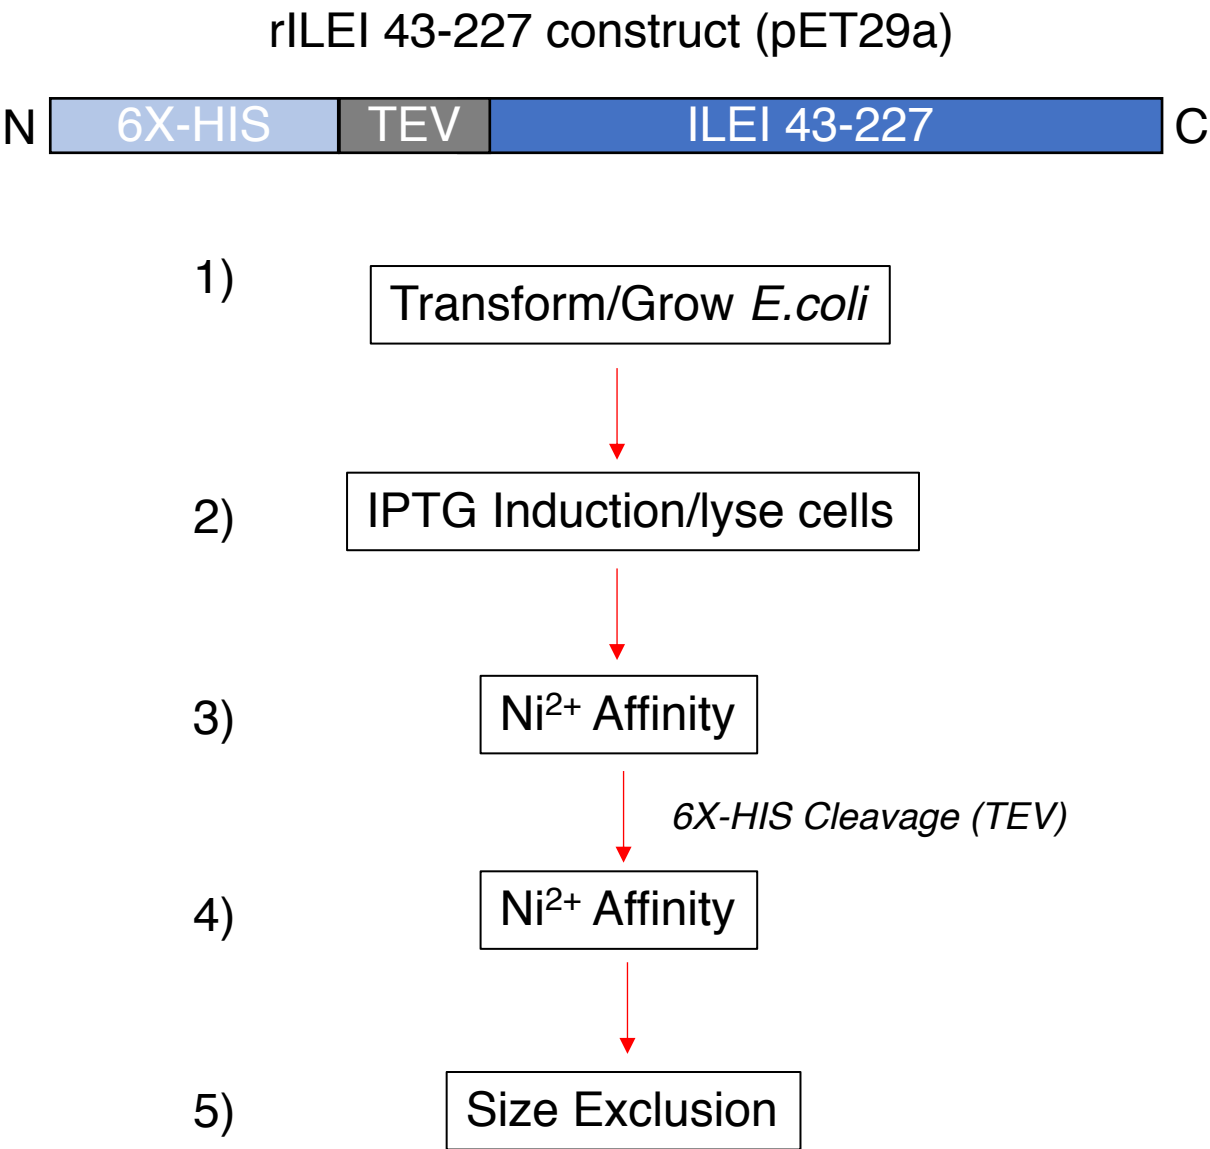

**b**

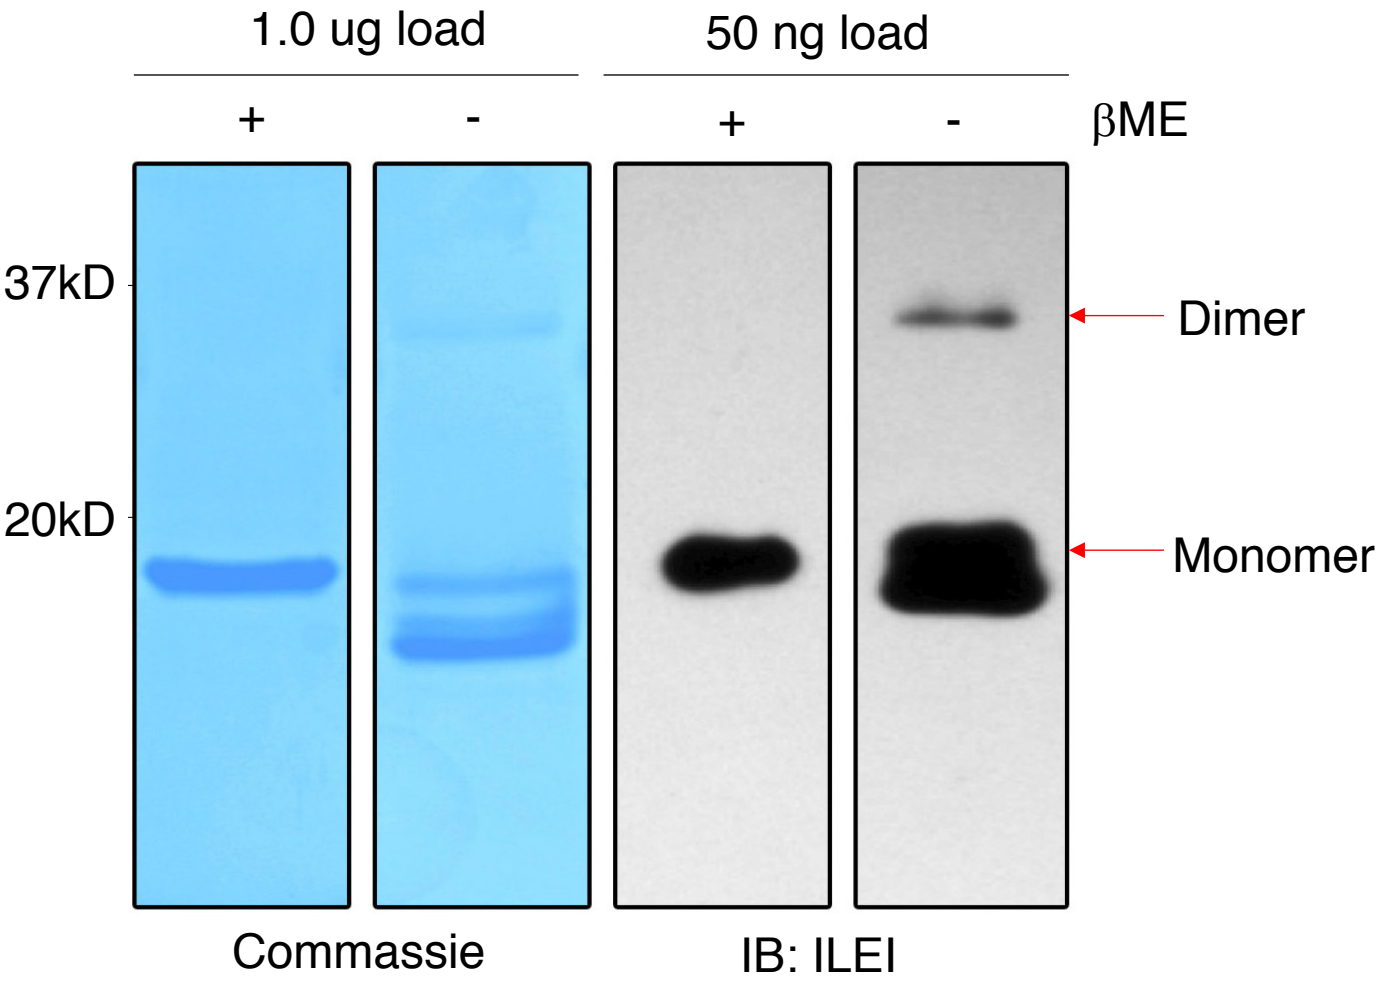

Supplement: NIHMS1518199-supplement-3.pdf [file NIHMS1518199-supplement-3.pdf]

**Figure S4**

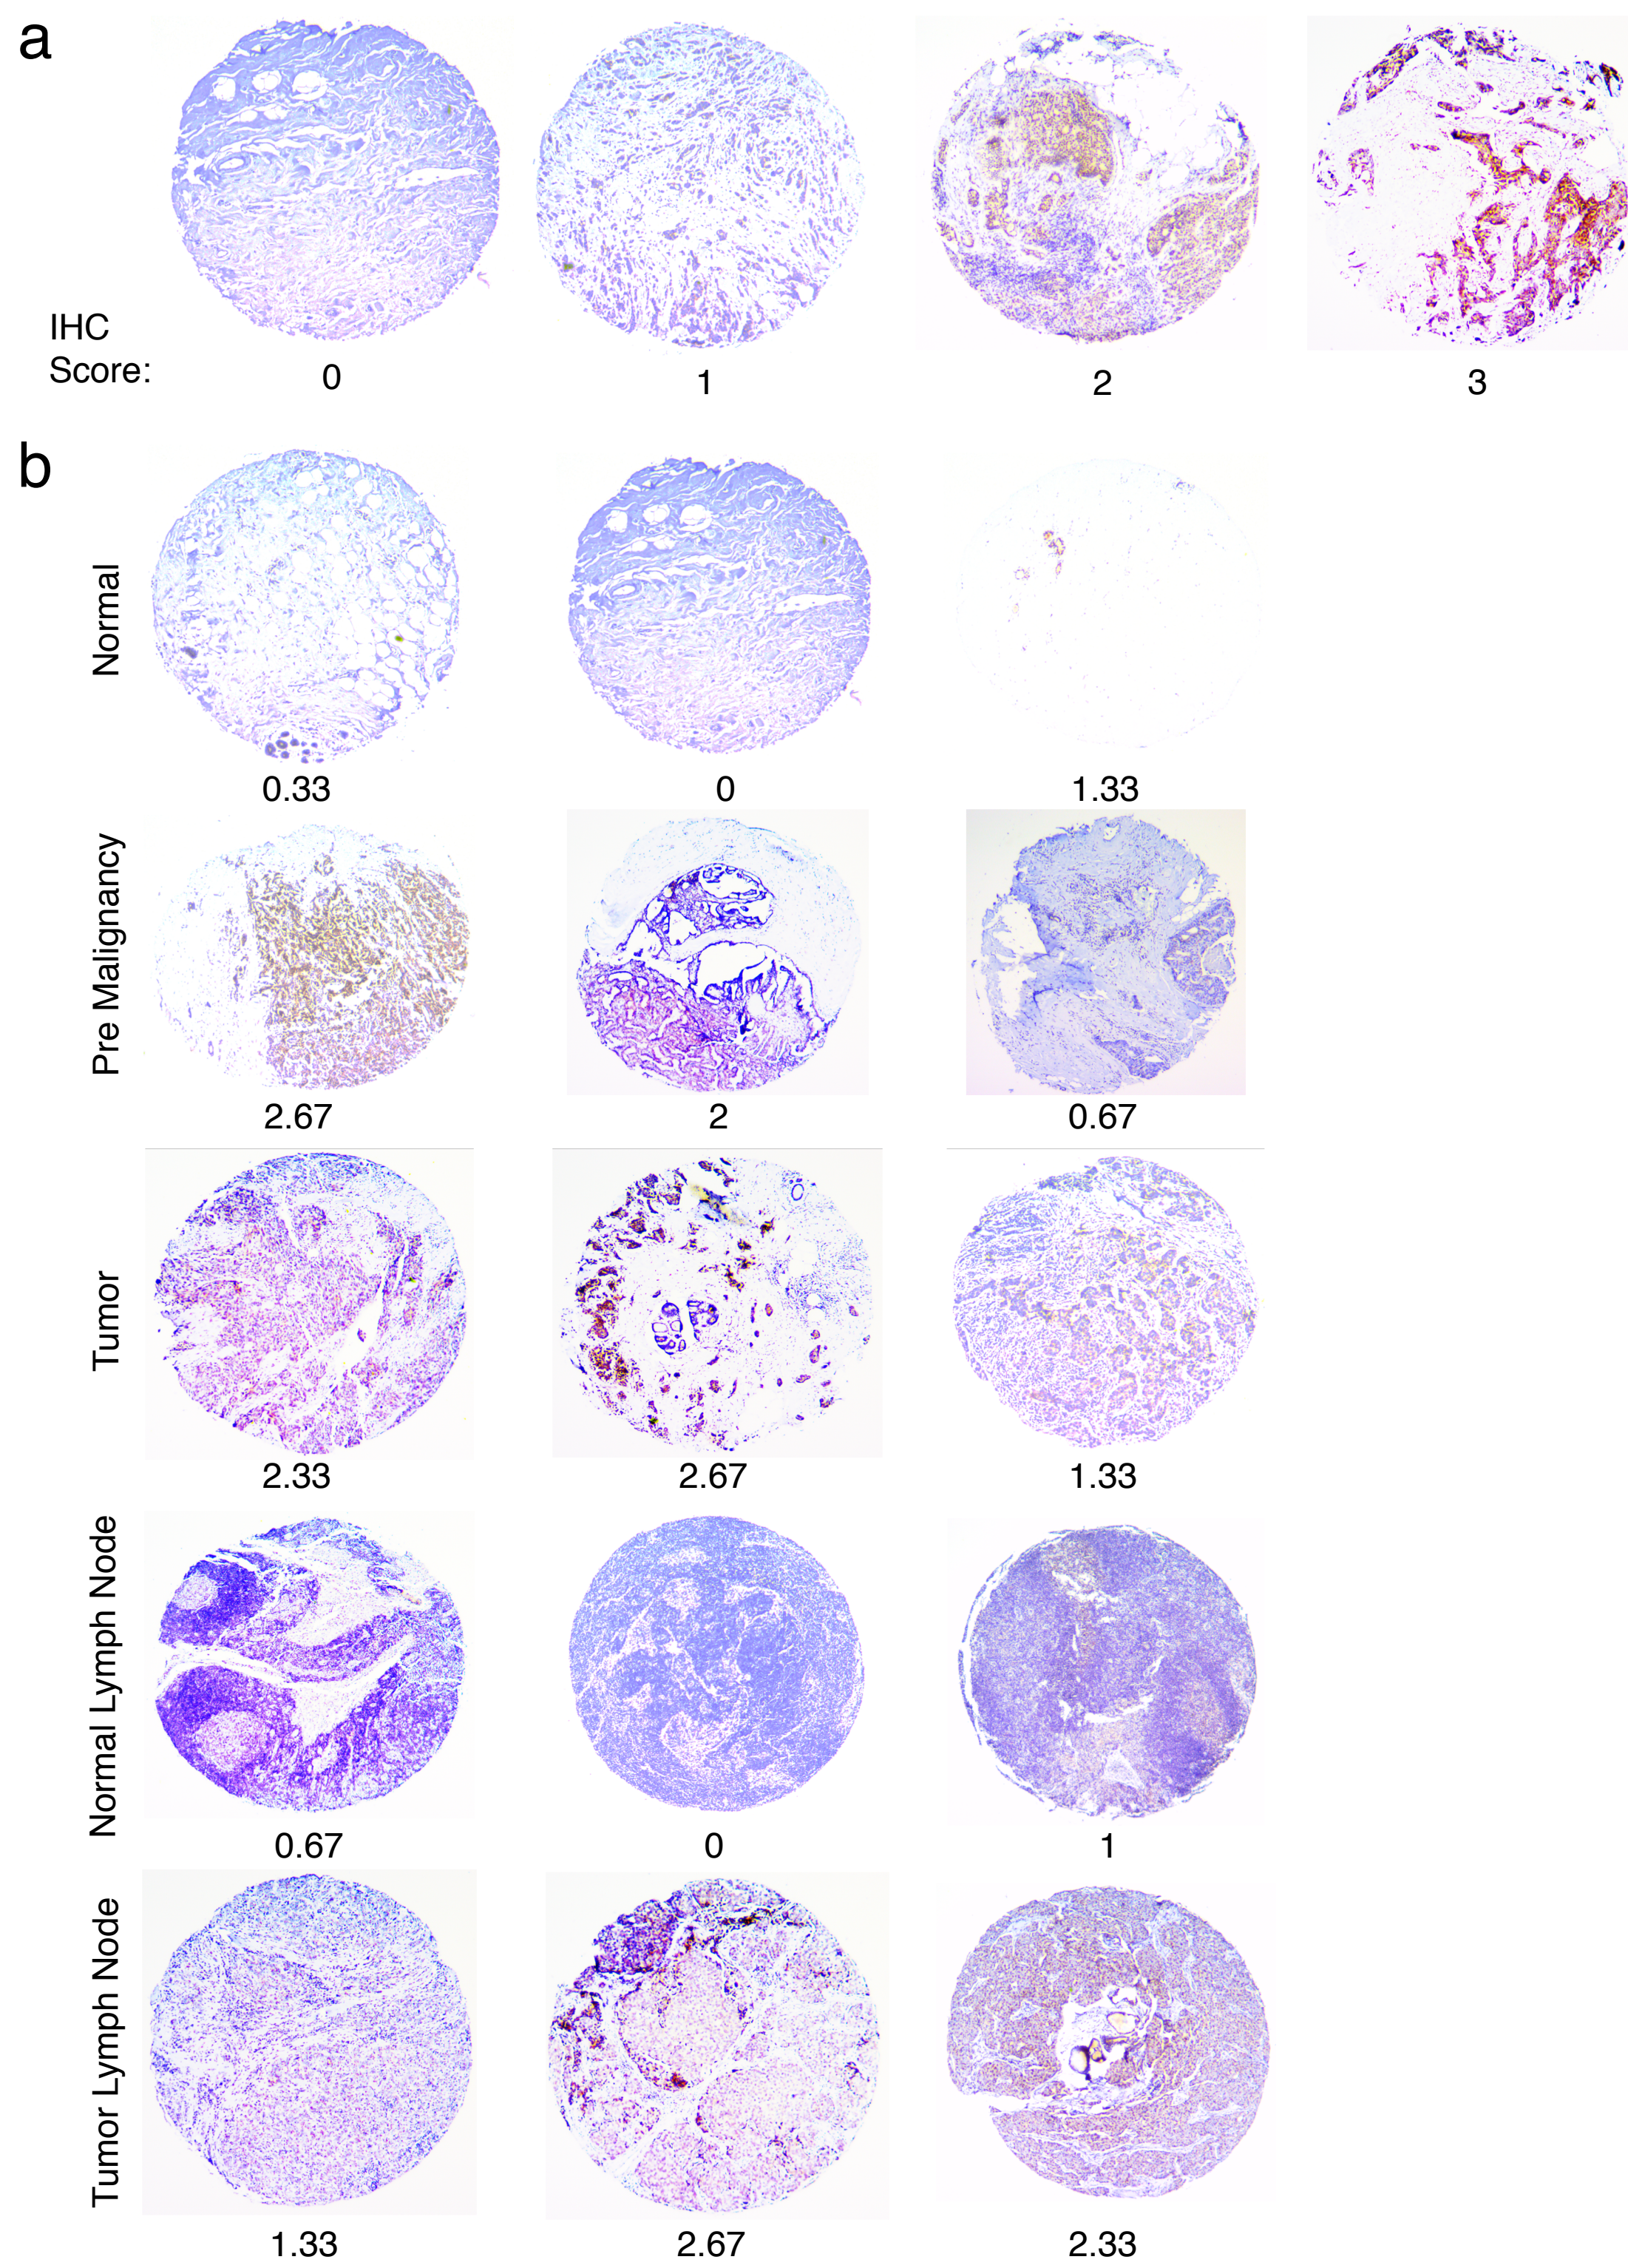

Supplement: NIHMS1518199-supplement-4.pdf [file NIHMS1518199-supplement-4.pdf]

**Figure S5**

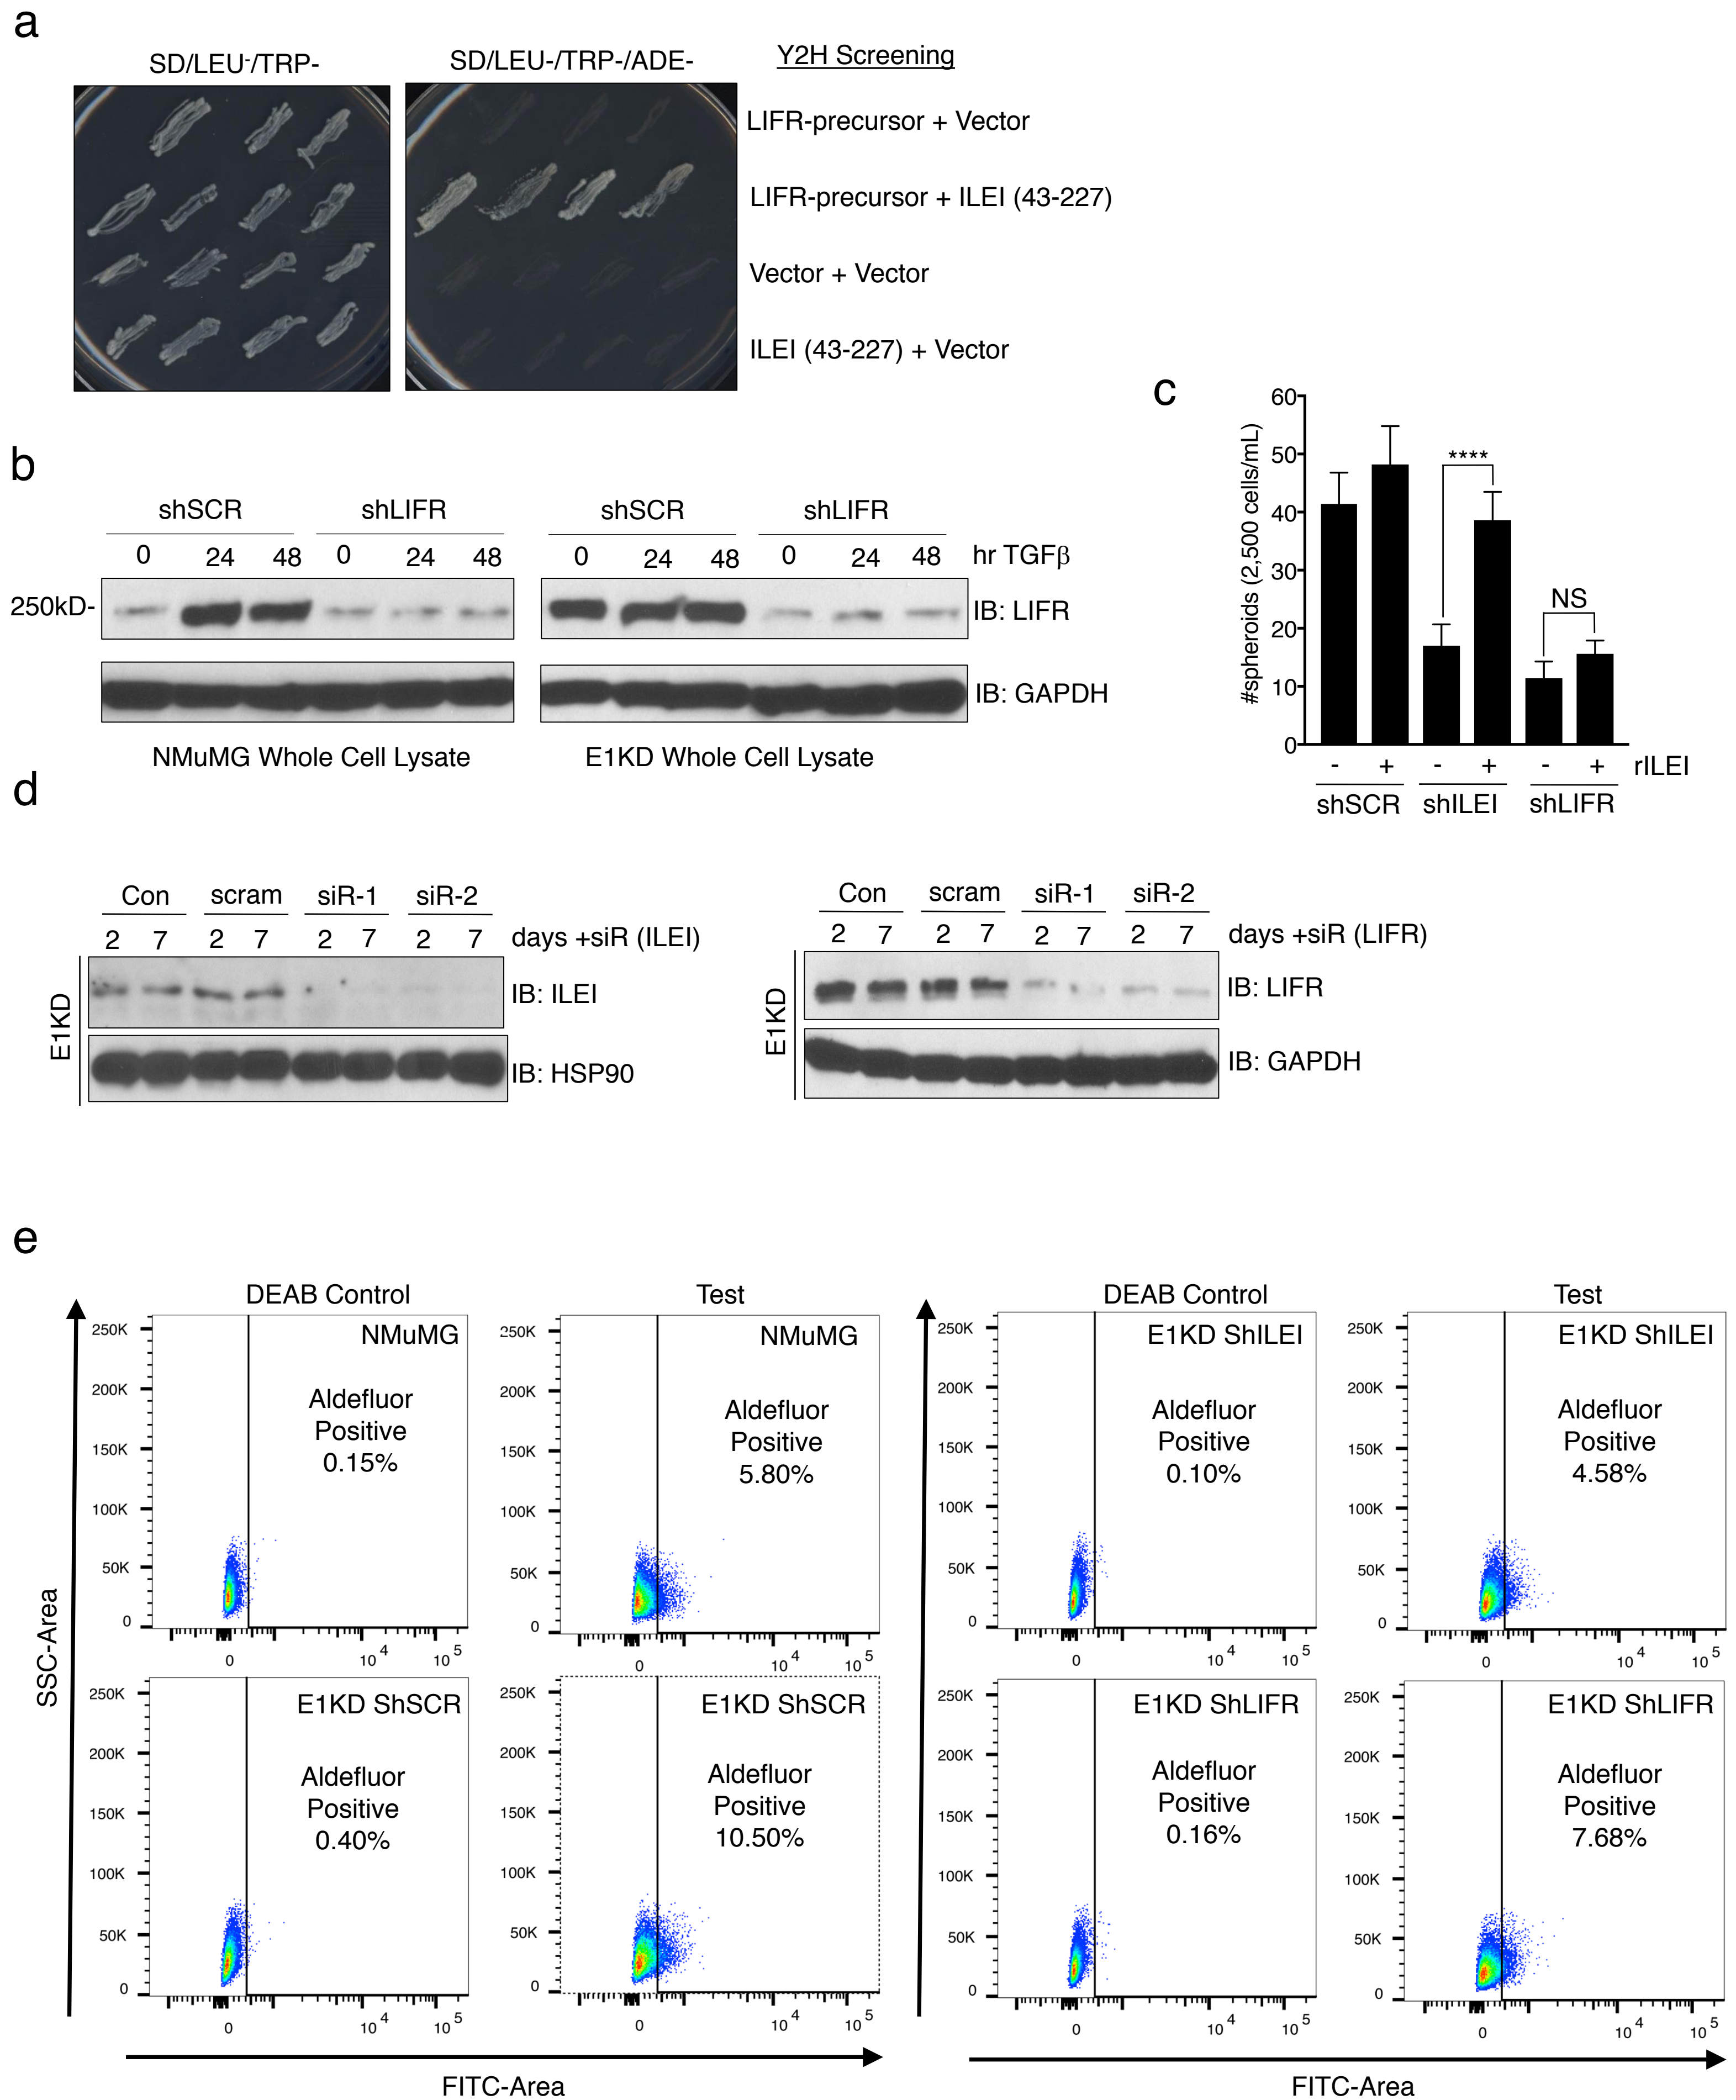

Supplement: NIHMS1518199-supplement-5.pdf [file NIHMS1518199-supplement-5.pdf]

**Figure S6**

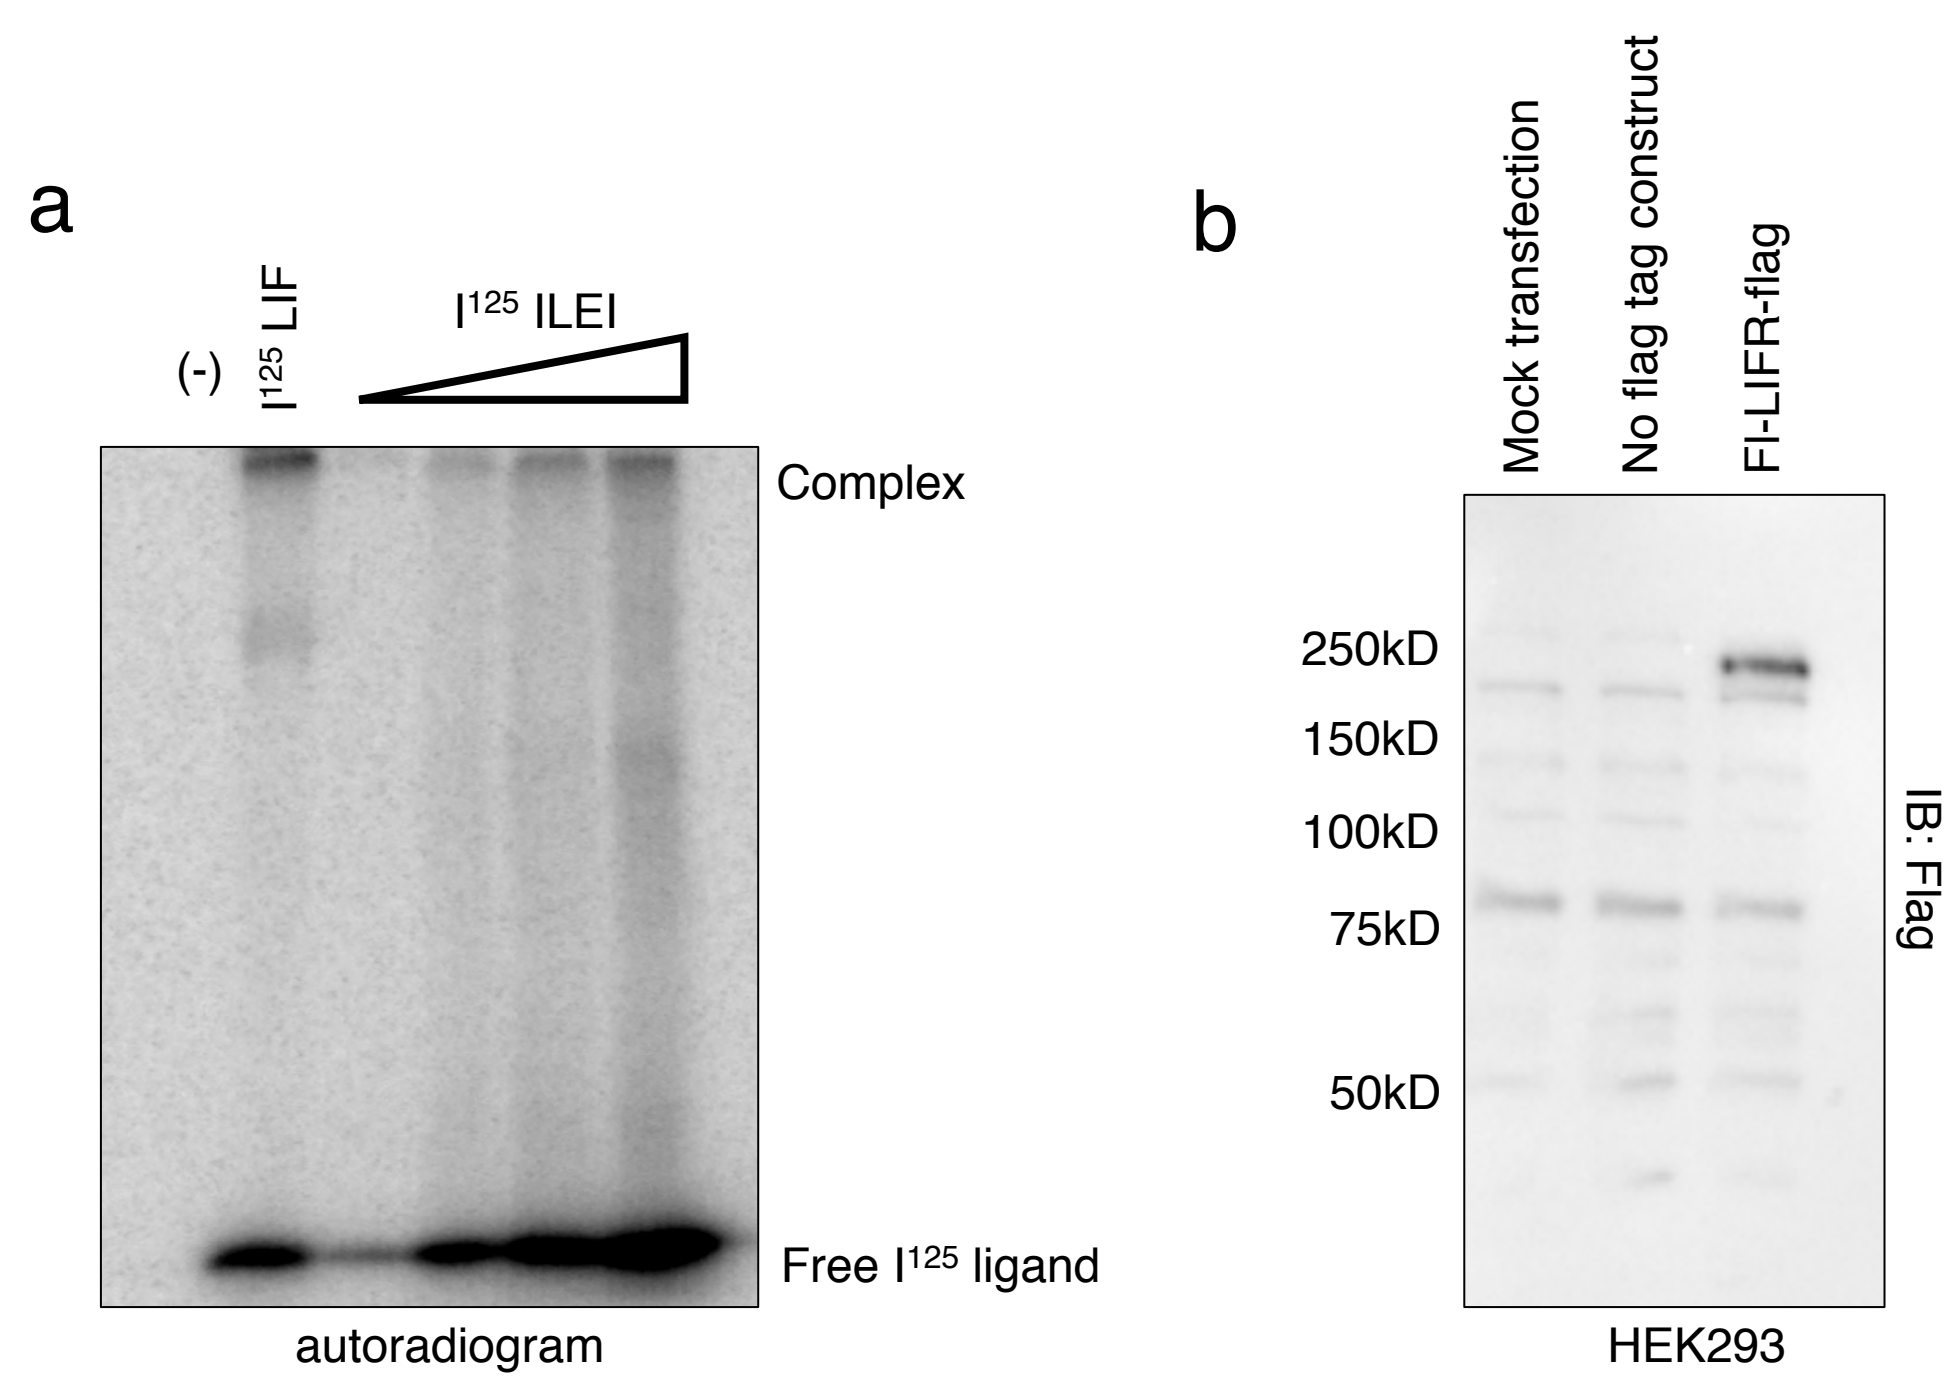

Supplement: NIHMS1518199-supplement-6.pdf [file NIHMS1518199-supplement-6.pdf]

Figure S7

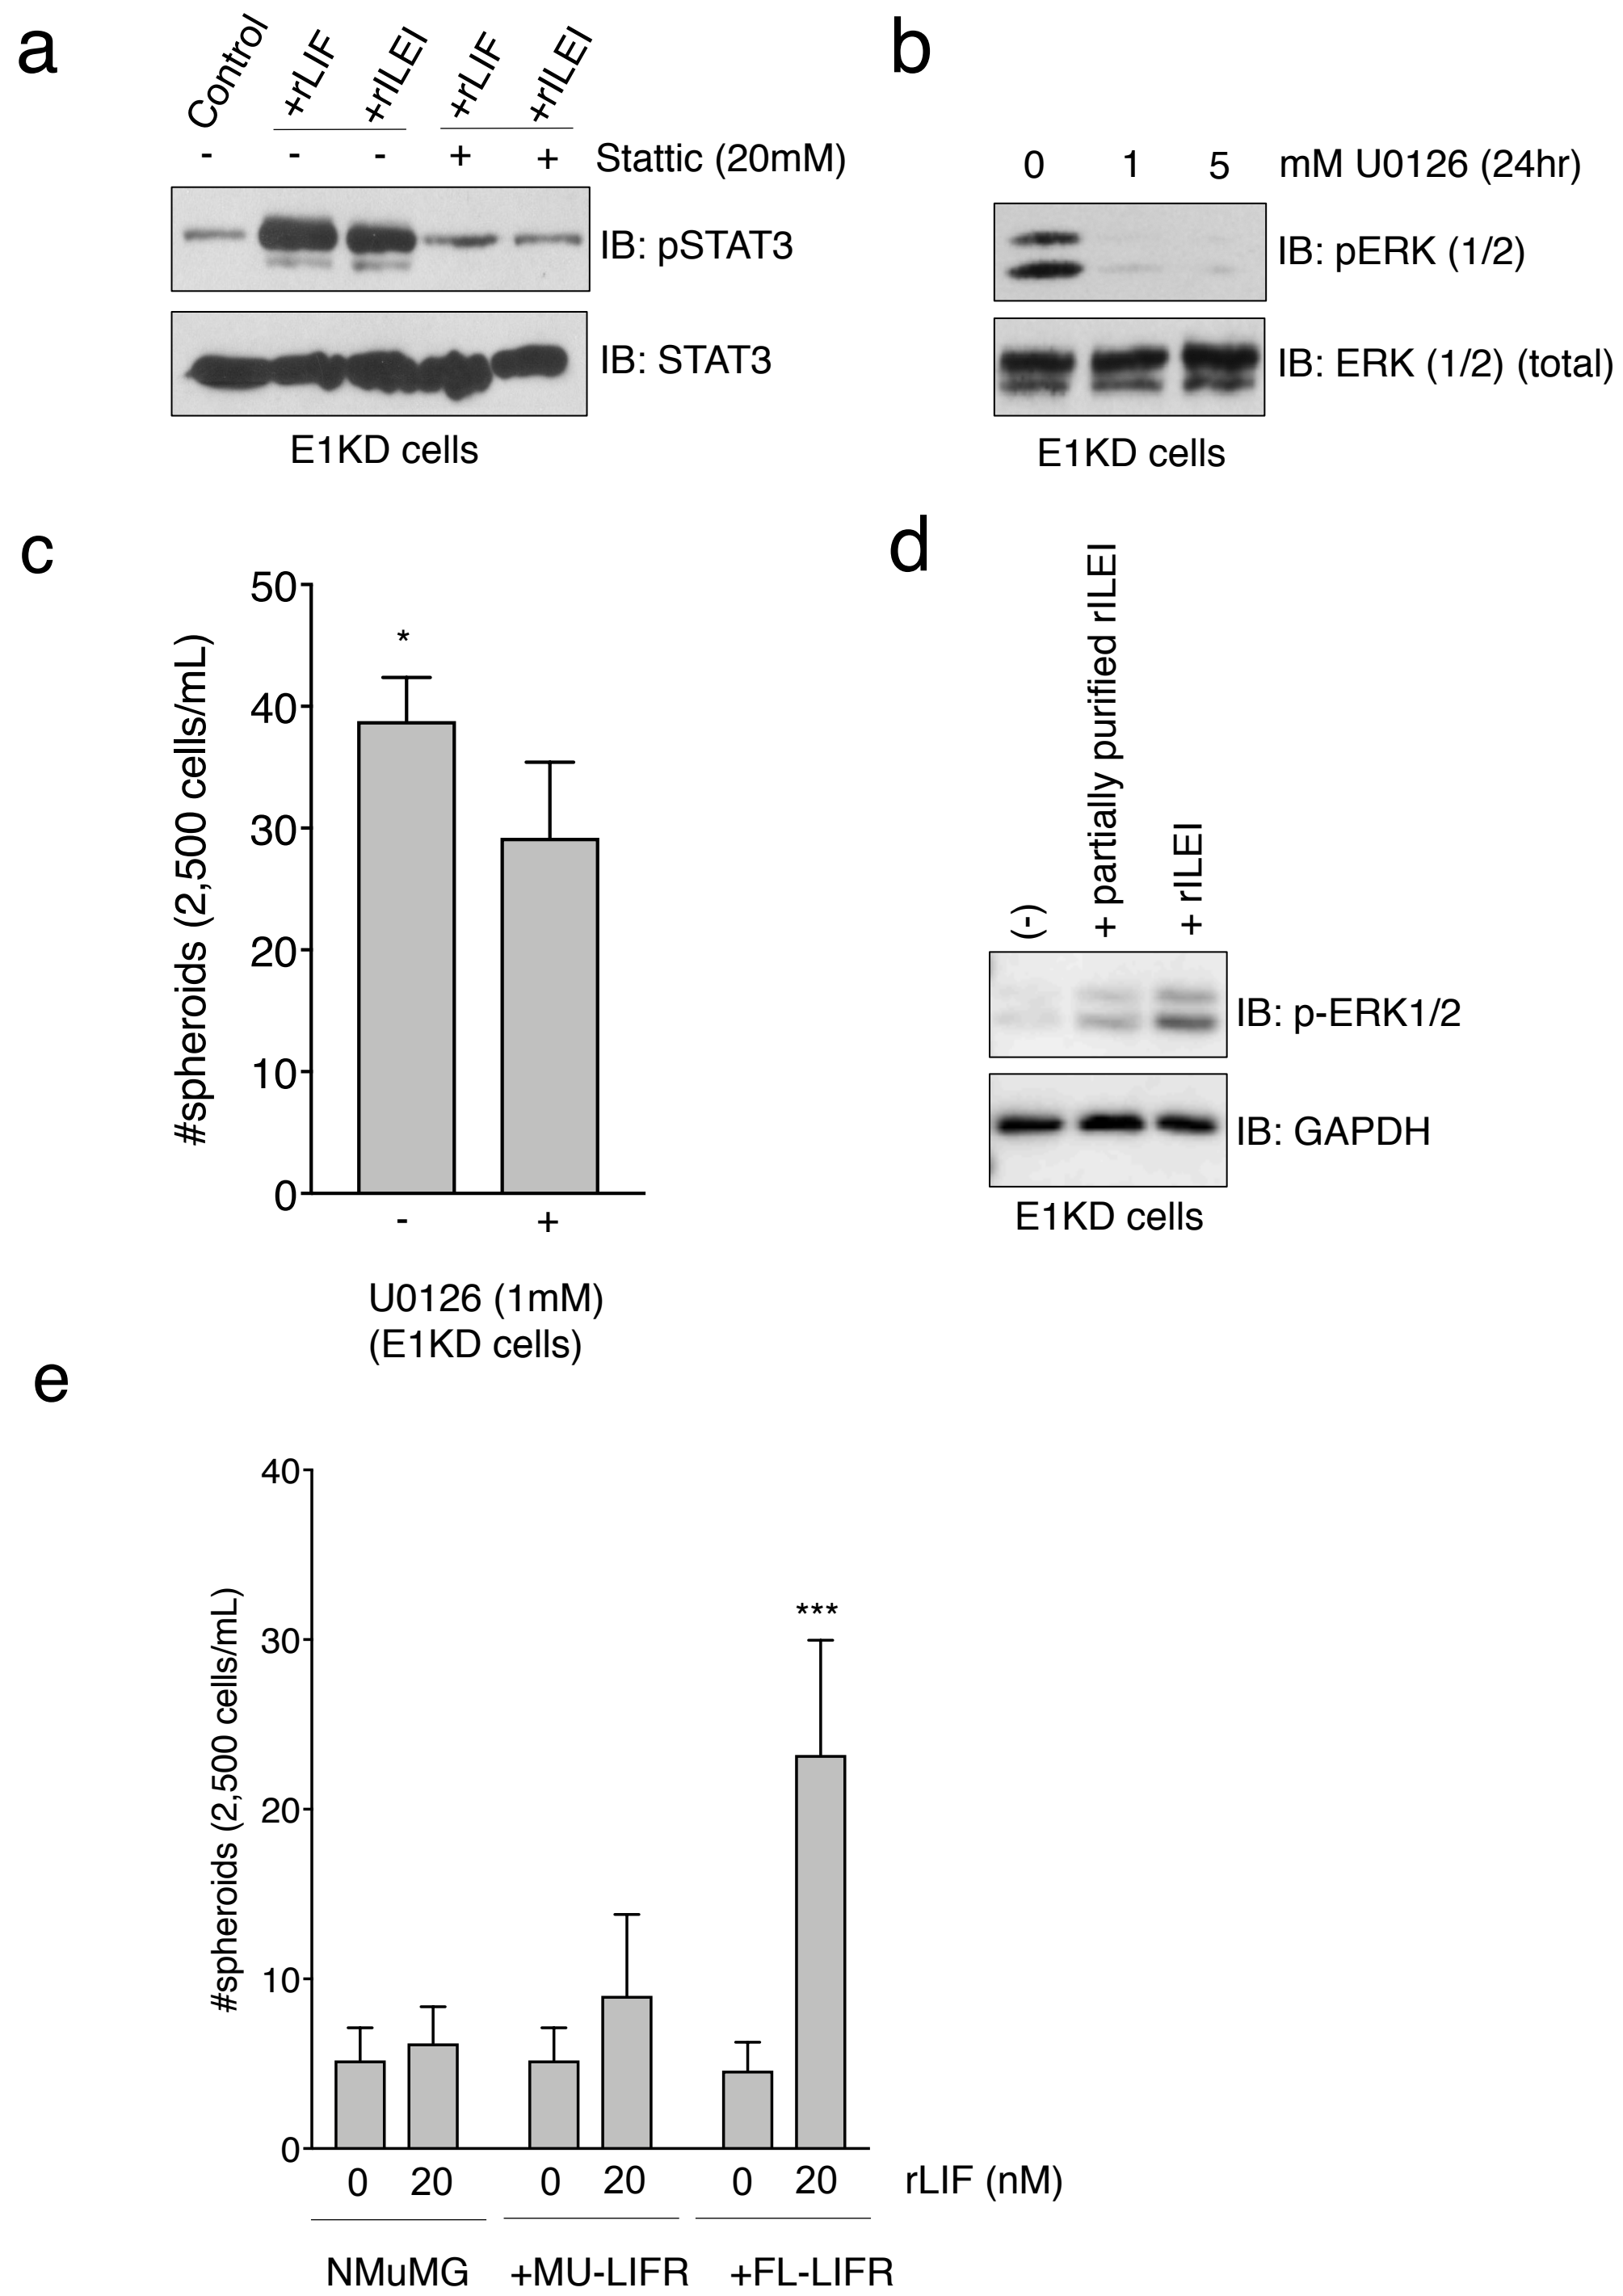

Supplement: NIHMS1518199-supplement-7.pdf [file NIHMS1518199-supplement-7.pdf]

**Figure S8**

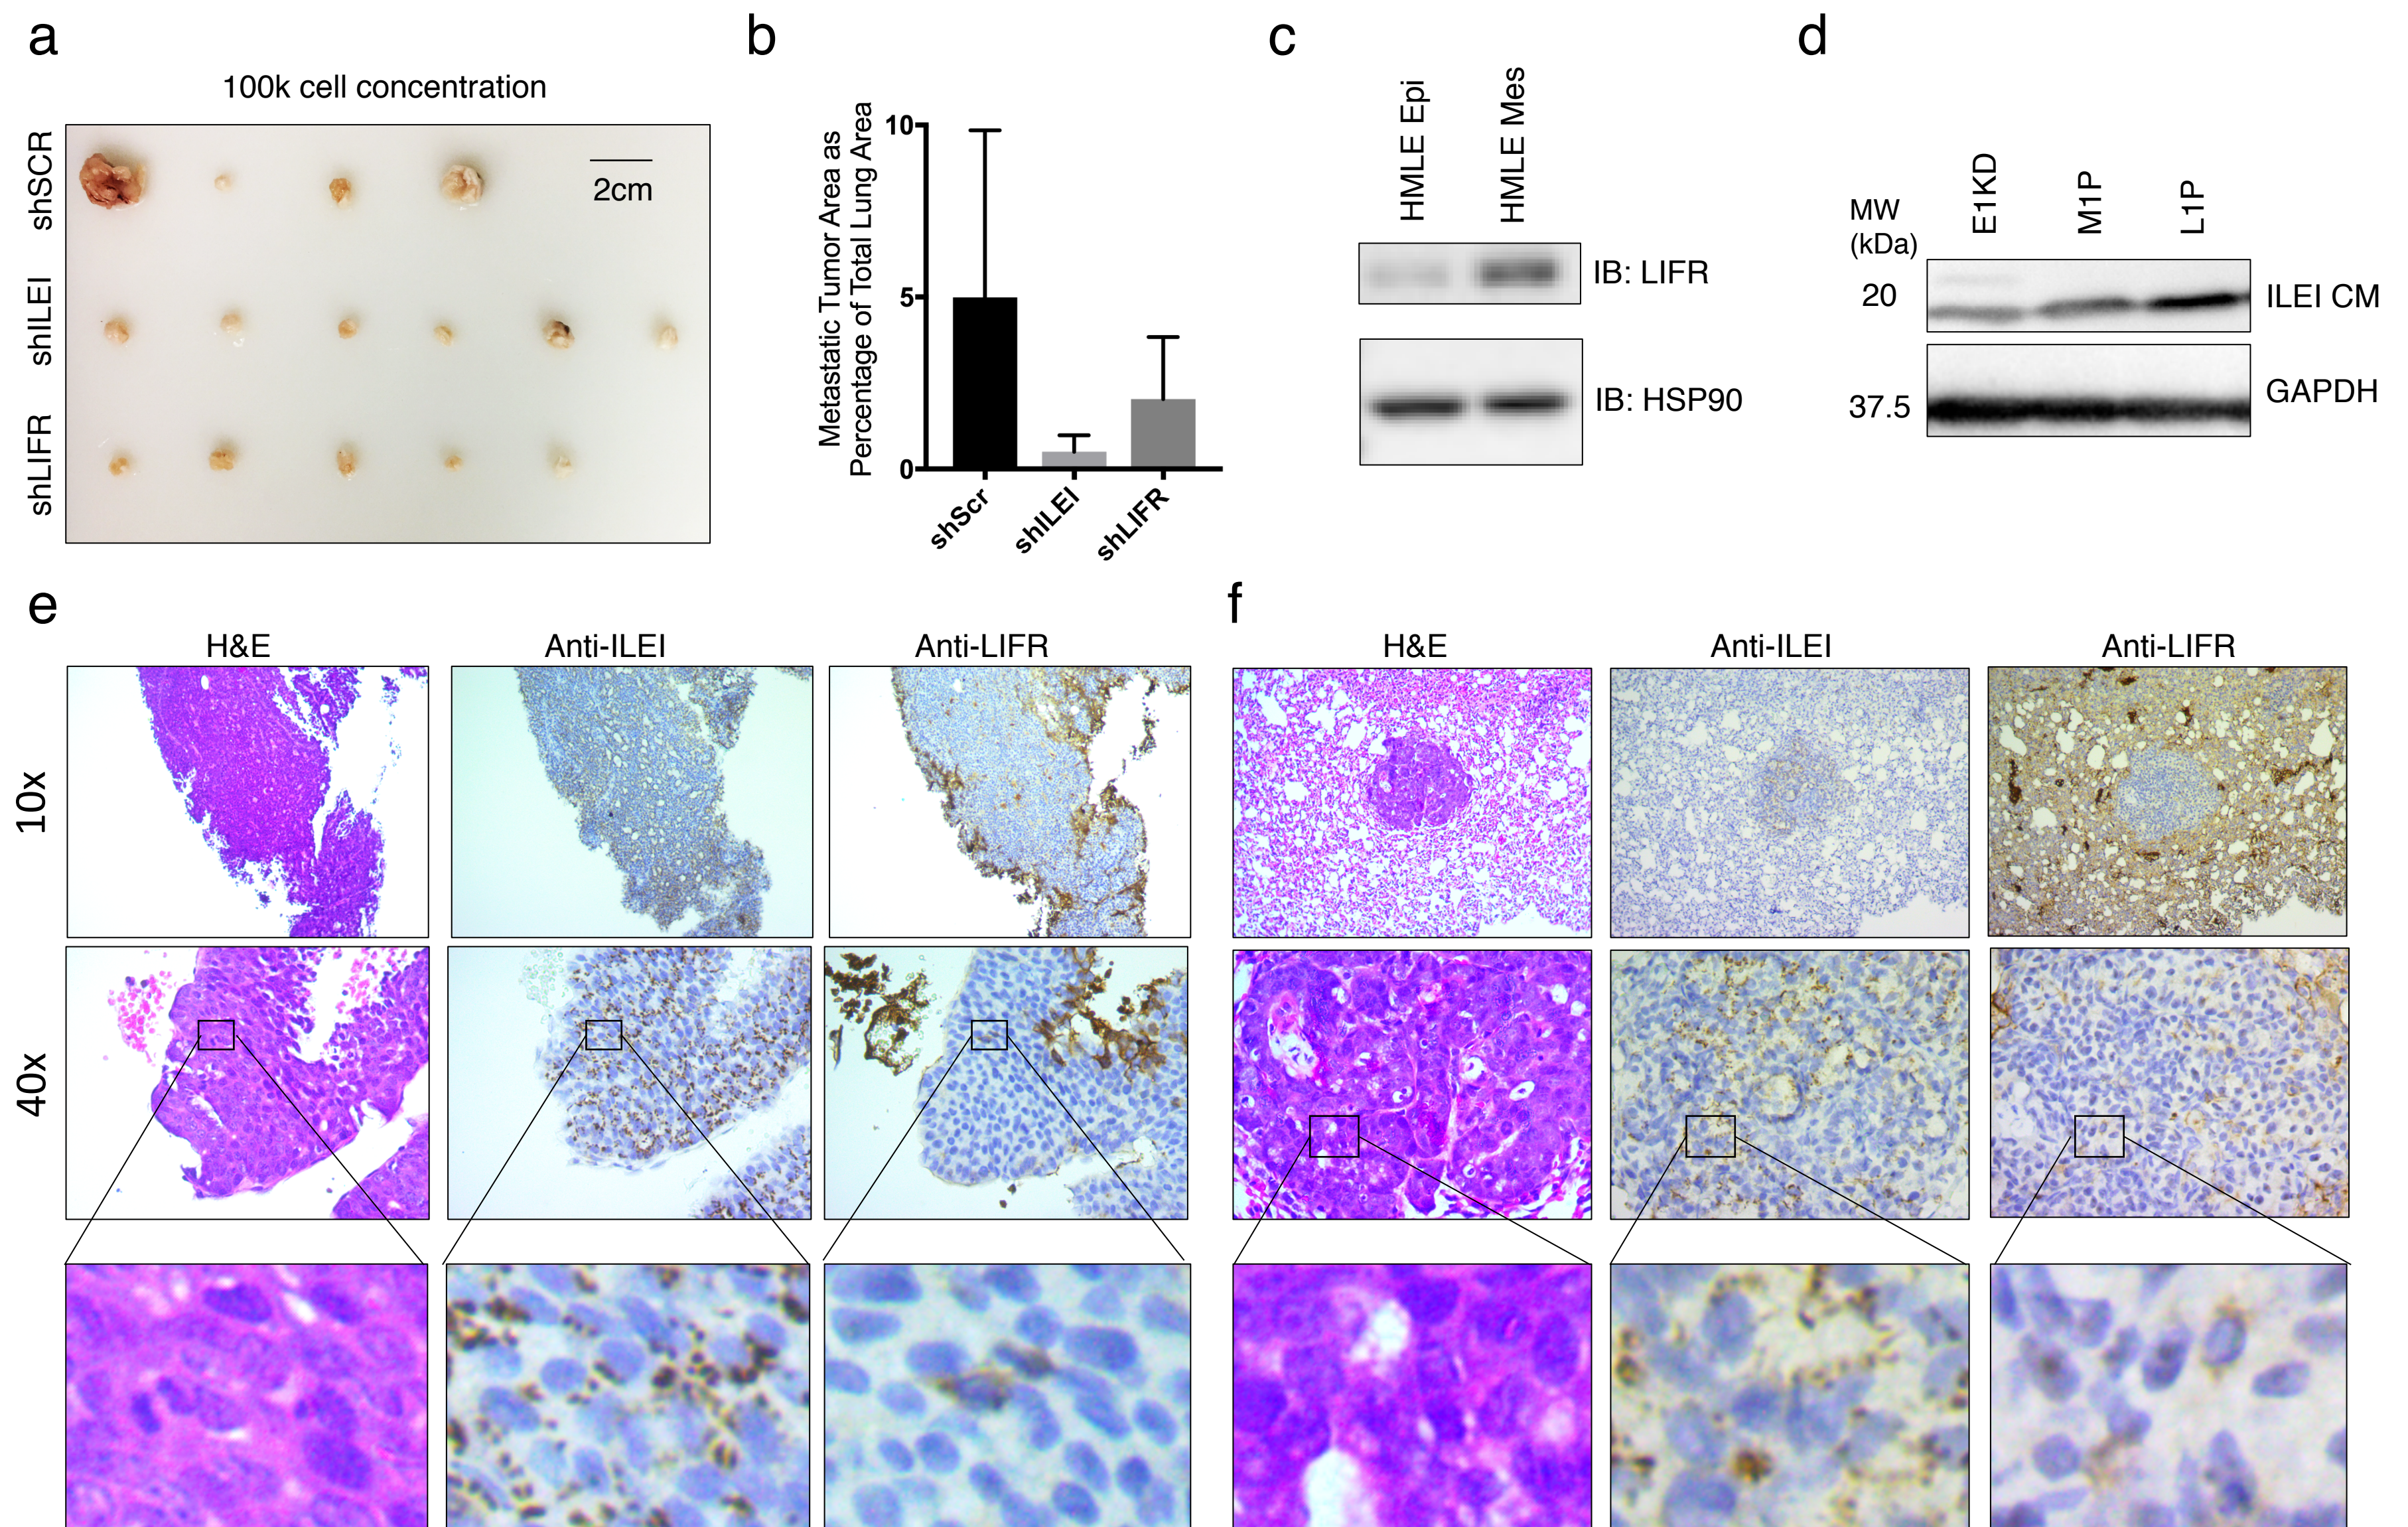

Supplement: NIHMS1518199-supplement-8.pdf [file NIHMS1518199-supplement-8.pdf]
